# Supplementary material
Source: publisher site journal article supplement (https://www.dovepress.com/article/606780)
Supplement: Supplementary file 1 [file 606780%20Supplementary%20Materials.docx]

**Table S1** Detailed parameters of MR sequences

| Parameters | TR | TE | BW | FOV | Matrix | Section thickness(mm) | Acquistion  time (sec) |
| --- | --- | --- | --- | --- | --- | --- | --- |
| Respiratory-triggered T2-weighted imaging | 4918 | 106 | 195 | 285×380 | 384×273 | 5.5 | Respiration-  dependent |
| Free-breathing DWI a | 5100 | 55 | 1565 | 285×380 | 192×154 | 5.5 | 74 |
| Breath-hold T1-weighted in-phase and opposed-phase imaging | 6.88 | 2.39/4.77 | 435 | 356×380 | 320×240 | 3.5 | 18 |
| Breath-hold T1-weighted VIBE imaging | 3.47 | 1.36 | 400 | 308×380 | 320×240 | 3 | 15 |

Note. — TR = Repetition time; TE = Echo time; BW = Bandwidth; FOV = Field of view;

DWI = Diffusion-weighted Imaging;

VIBE = Volumetric interpolated breath-hold examination

a performed with b values of 0 and 500 sec/mm2

**Table S2** Distribution of highly variable and non-zero variance radiomics features across different sequences

| **Number** | **PRE** | **AP** | **VP** | **DP** | **DWI** | **T2WI** |
| --- | --- | --- | --- | --- | --- | --- |
| **Original features#** | 2447 | 2447 | 2447 | 2447 | 2447 | 2447 |
| **Filtered features*** | 1098 | 1193 | 1198 | 1185 | 1215 | 1128 |

Note. —Original features# represents the total number of features extracted from each sequence; Filtered features* represents the remaining features after excluding those with zero variance and a median absolute deviation (MAD) ≤ 1

Abbreviations: PRE, T1-weighted imaging; AP, arterial phase; VP, portal venous phase; DP, delayed phase sequences; DWI, diffusion-weighted imaging; T2WI, T2-weighted imaging.

**Table S3** Comparison of C-indexes for Clinical, Imaging, Clinico-Imaging and Clinical-Imaging-Rad models in both training and test sets for OS and RFS.

|  | **OS** | | |  | **RFS** | | |  |
| --- | --- | --- | --- | --- | --- | --- | --- | --- |
| **Models** | **Training** | ***P-*value** | **Testing** | ***P-*value** | **Training** | ***P-*value** | **Testing** | ***P-*value** |
| Clinical | 0.731 [0.667 - 0.796] | 0.192 | 0.676 [0.602 - 0.751] | 0.217 | 0.637 [0.565 - 0.697] | 0.596 | 0.636 [0.565 - 0.709] | 0.829 |
| Imaging | 0.670 [0.557 - 0.780] | 0.011 | 0.626 [0.535 - 0.729] | 0.030 | 0.587 [0.527 - 0.647] | 0.041 | 0.546 [0.488 - 0.611] | 0.034 |
| Clinico-Imaging | 0.735 [0.648 - 0.816] | 0.225 | 0.701 [0.621 - 0.778] | 0.436 | 0.630 [0.570 - 0.688] | 0.535 | 0.608 [0.541 - 0.673] | 0.441 |
| Clinical-Imaging-Rad | 0.797 [0.711 - 0.871] | ref | 0.740 [0.658 - 0.819] | ref | 0.664 [0.589 - 0.729] | ref | 0.647 [0.577 - 0.709] | ref |

Abbreviations: OS, overall survival; RFS, recurrence-free survival.

**Figure S1:** Forest plot of log hazard ratios for OS and RFS predictors in the RIH-based model.


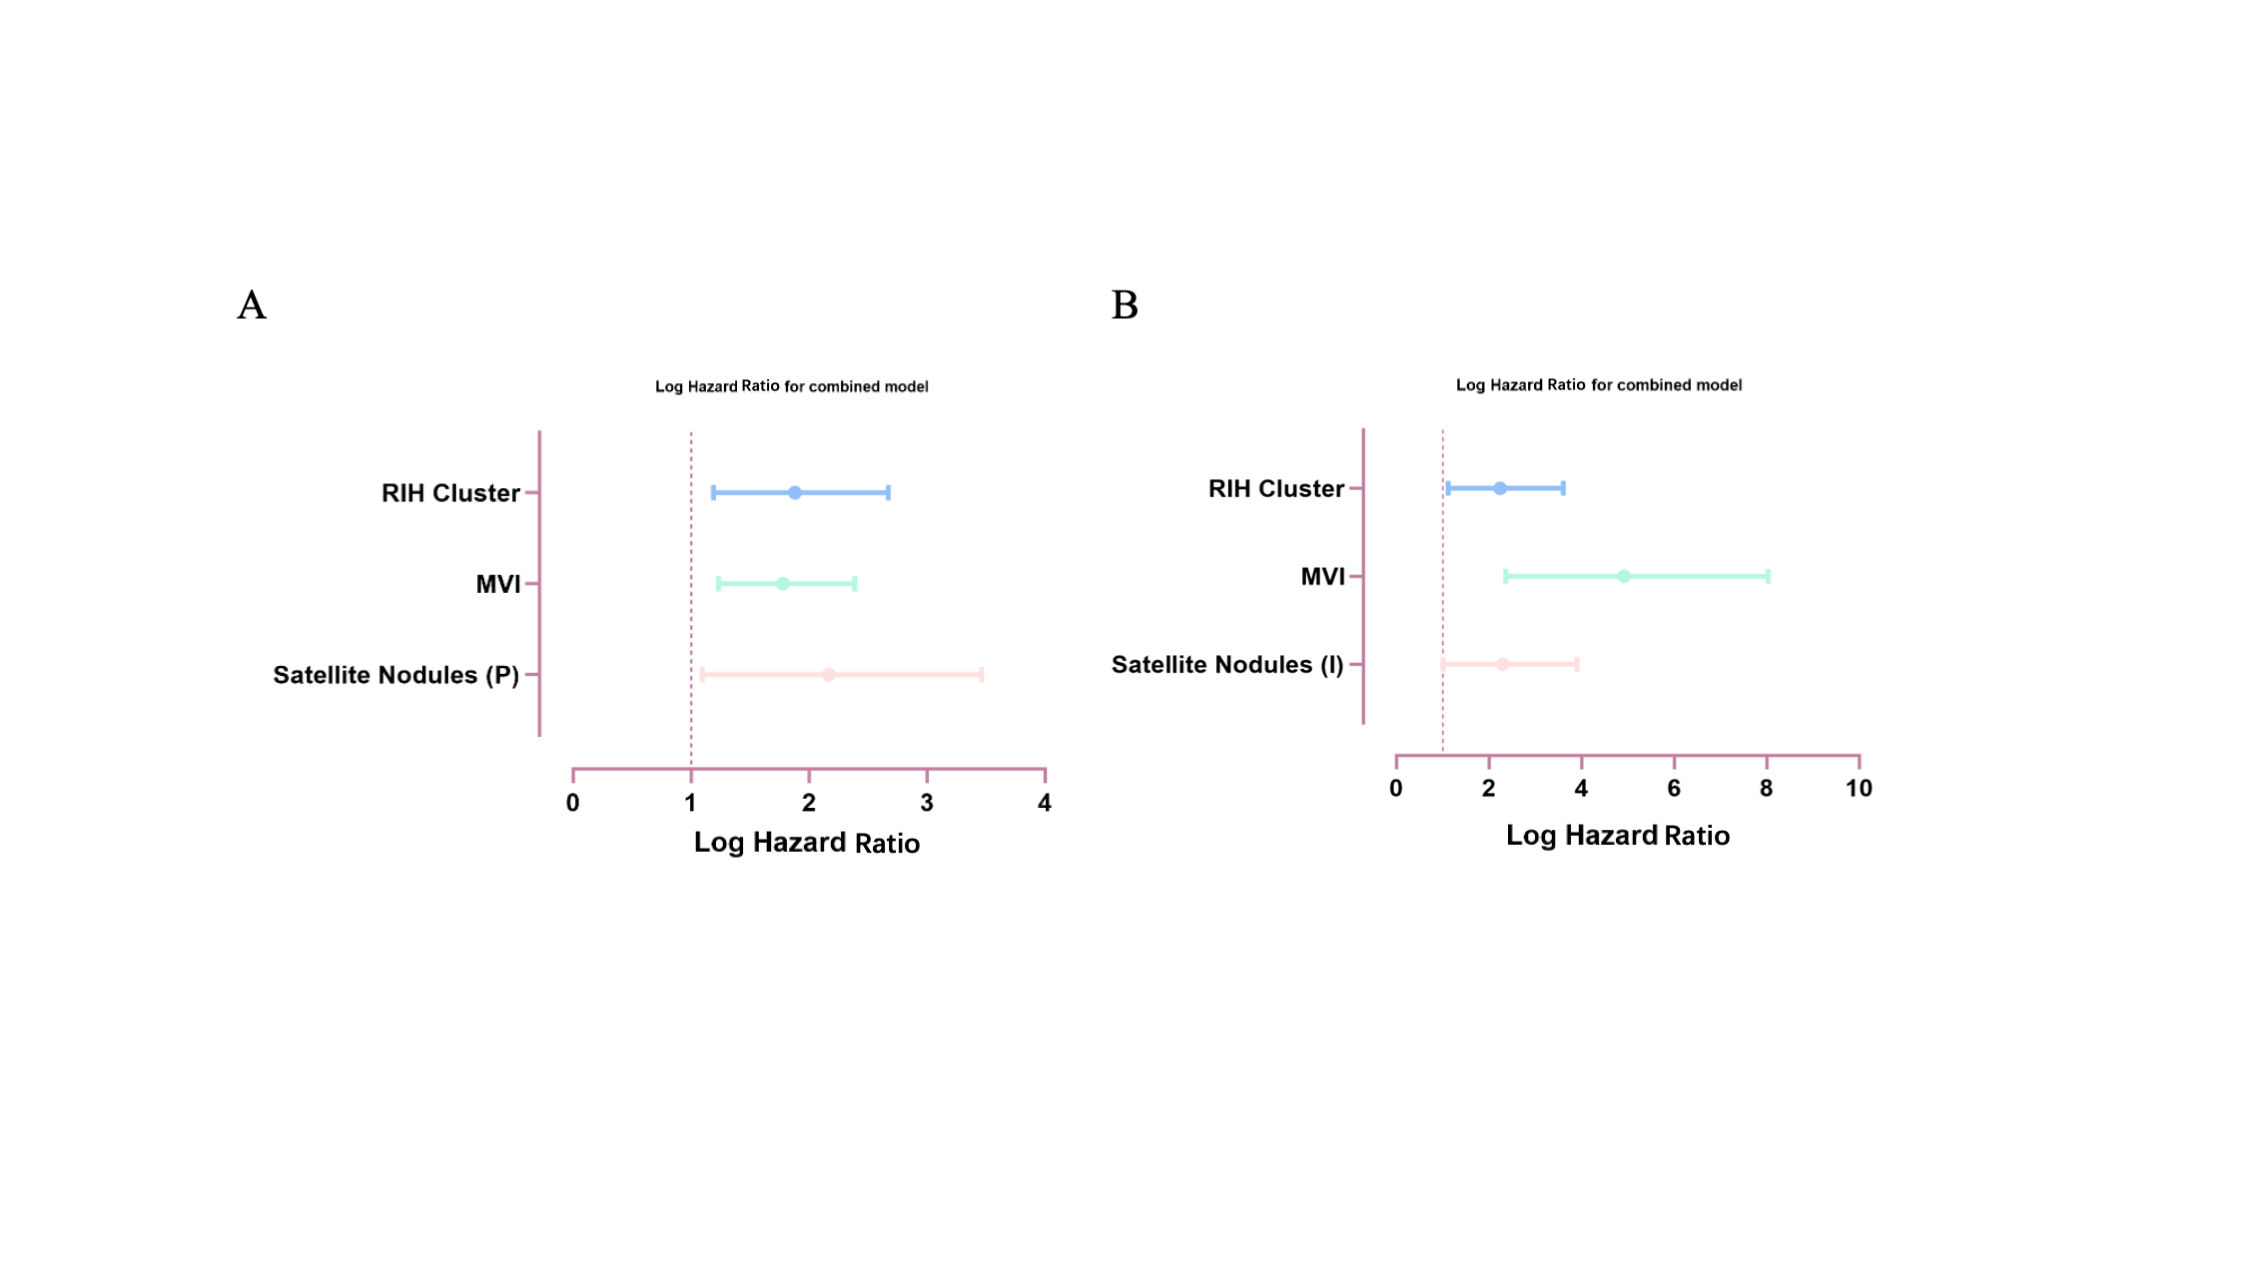
(A) RFS predictors; (B) OS predictors. Abbreviations: OS, overall survival; RFS, recurrence-free survival; RIH, radiomics image heterogeneity; MVI, microscopic vascular invasion; Satellite Nodules (P), Pathological Satellite Nodule; Satellite Nodules (I), Satellite Nodule on imaging.

**Figure S2** Time-dependent ROC curves of the RIH cluster for predicting 1-, 3-, and 5-year OS and RFS.


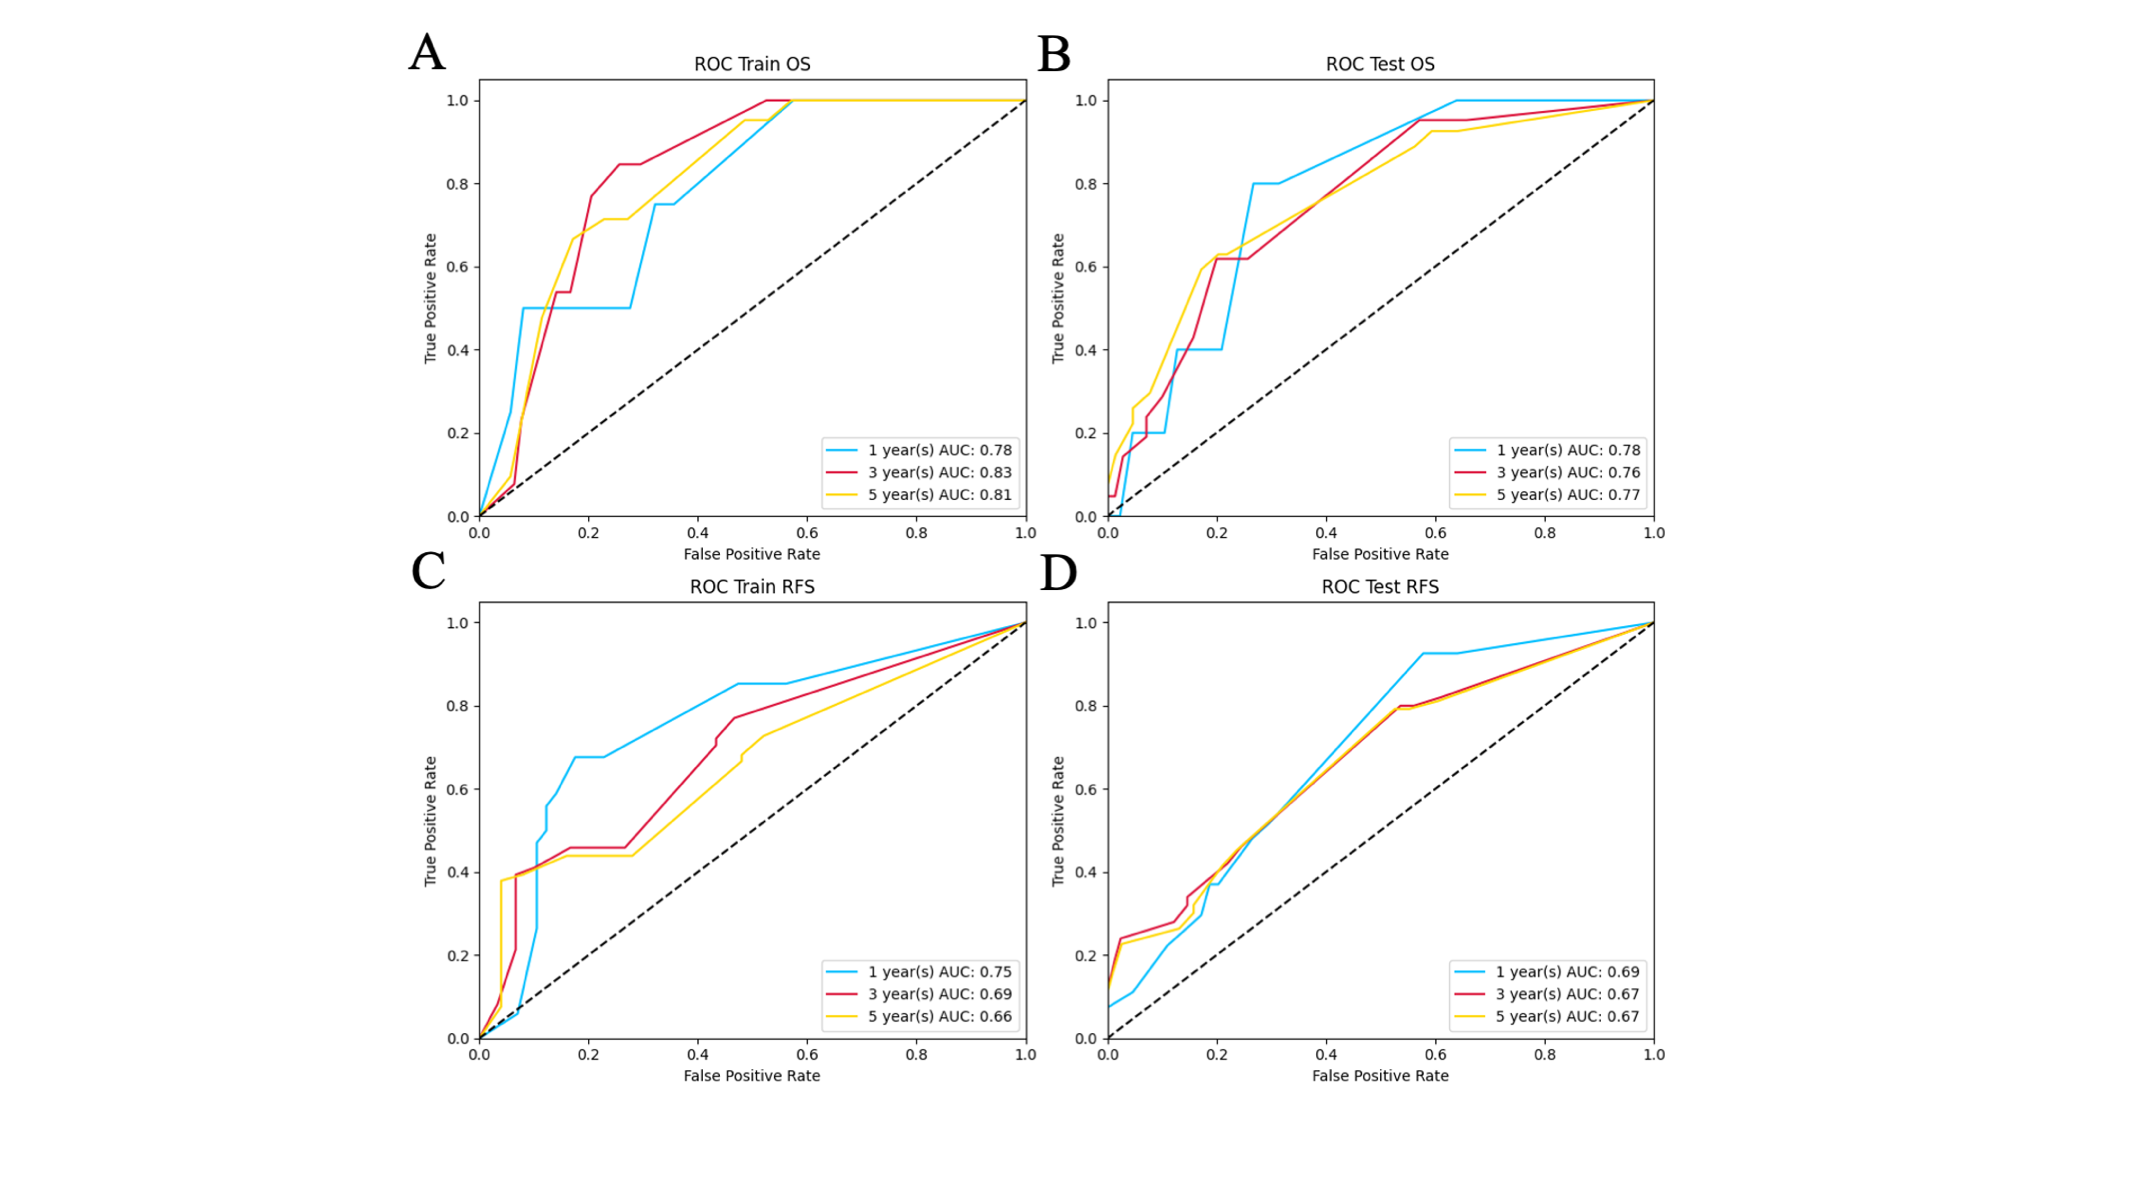
(A) OS in the training set; (B) OS in the test set; (C) RFS in the training set; and (D) RFS in the test set. Abbreviations: OS, overall survival; RFS, recurrence-free survival; AUC, area under the curve; ROC, receiver-operating characteristic.

**
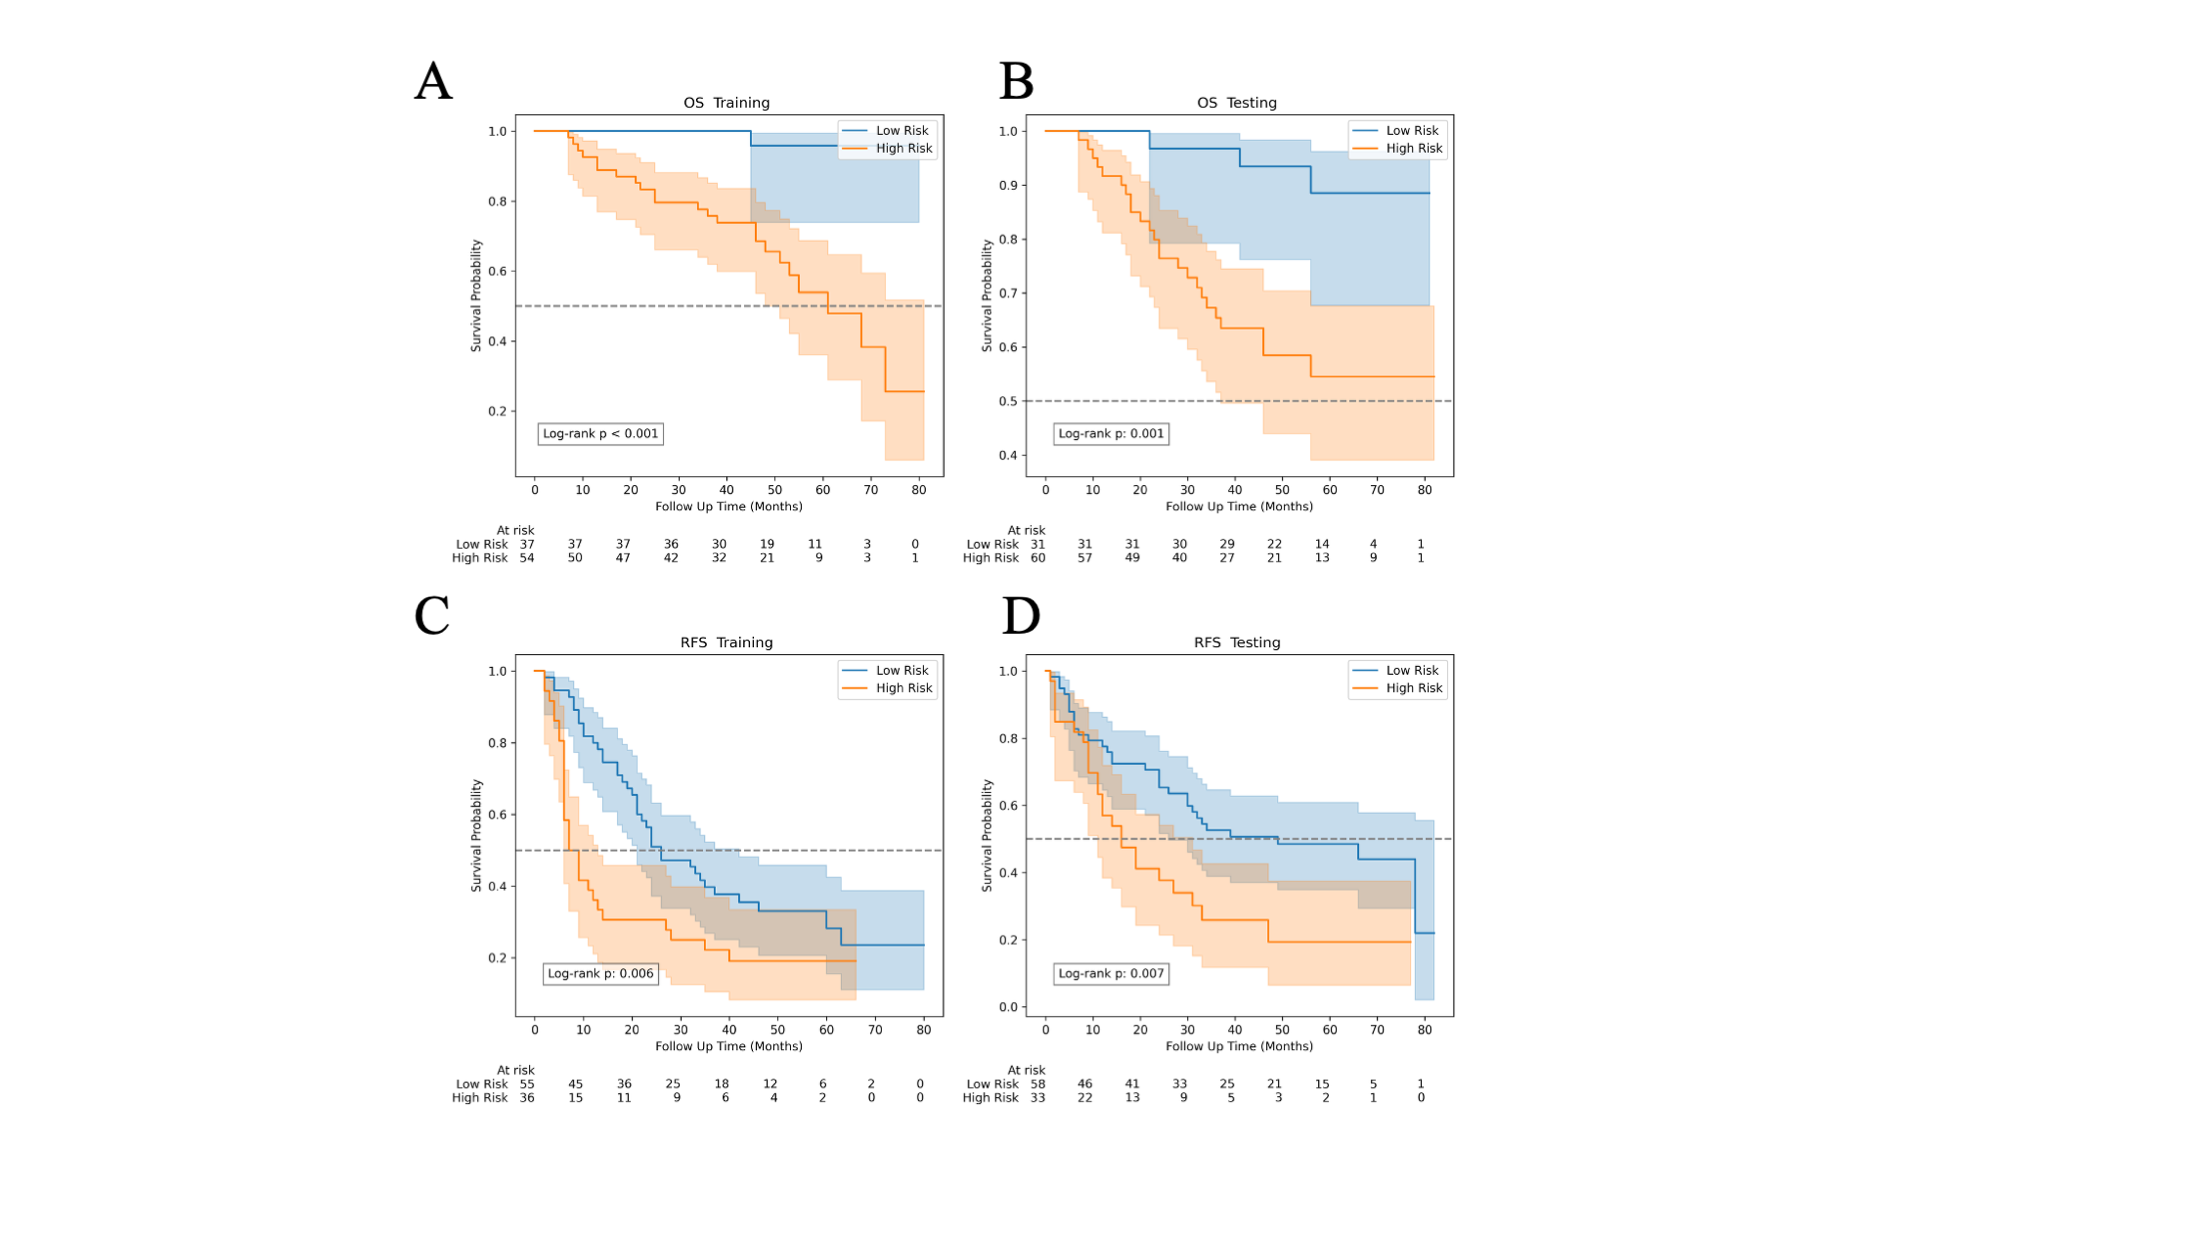
Figure S3**Kaplan-Meier curves of risk groups stratified by the RIH-based model for OS and RFS. (A) OS in the training cohort; (B) OS in the testing cohort; (C) RFS in the training cohort; and (D) RFS in the testing cohort. Abbreviations: OS, overall survival; RFS, recurrence-free survival.

**Supplementary Material 1:** **Definitions of MR features**

The following MR features were evaluated in the study: a) tumor diameter was defined as the largest outer-edge-to-outer-edge dimension of the lesion. The measurement was carried out in the portal vein phase and included the radiological capsule1; b) satellite nodule was defined as the a smaller nodule attached to or within 2 cm of the main tumor1; c) hemorrhage in mass was defined as intralesional blood products in the absence of biopsy, trauma or intervention1; d) fat in mass was defined as the presence of lipid within a mass in higher concentration than in the background liver, which manifested as the single loss on out-of-phase compared with in-phase T1-weighed GRE images2; e) arterial rim enhancement was defined as the presence of irregular ring-line enhancement with central hypointense areas on the arterial phase1; f) radiological capsule was defined as peripheral rim of uniform and smooth hyperenhancement in the portal venous or delayed phase; g) peritumoral enhancement was defined as the presence of enhancing area outside tumor border on the arterial phase, which becomes isointense with background liver parenchyma in the later dynamic phases3; h) mosaic architecture was defined as the presence within a mass of randomly distributed internal nodules or compartments differing in enhancement, intensity, shape and size and often separated by fibrous septations2; i) nodule-in-nodule architecture was defined as the presence of smaller inner nodule within a larger nodule or mass and having different imaging features1; j) atypical enhancement pattern was defined as the absence of arterial wash-in or portal venous/equilibrium wash-out4.

**Supplementary Material 2:** **Parameter settings for PyRadiomics-based feature extraction**

Radiomics features were extracted using the PyRadiomics open-source platform, with parameter configurations meticulously selected to maximize reproducibility and methodological robustness. A fixed bin width of 25 was implemented for gray-level discretization. This setting was chosen to strike an optimal balance between the preservation of essential textural information and the mitigation of noise-induced intensity variability, adhering to established standards in foundational radiomics literature5-8. Laplacian of Gaussian (LoG) filters with varying sigma values (0.5, 1.0, 1.5, and 2.0) were applied to capture multi-scale tumor heterogeneity. Specifically, smaller sigma values were utilized to highlight fine, high-frequency textural details, while larger sigma were employed to emphasize coarser, low-frequency structural patterns. To harmonize variations in slice thickness and in-plane resolution across heterogeneous MRI sequences, images were resampled to an isotropic-like voxel spacing of [1, 1, 3]. This preprocessing step significantly reduces acquisition-related bias. A B-spline interpolator was employed during resampling to ensure seamless and accurate intensity interpolation without the introduction of artificial discontinuities. Furthermore, the normalizeScale = 1 parameter was applied to standardize the intensity dynamic range across different patients and sequences.

These parameter choices follow established conventions and methodological recommendations, particularly the framework described by van Griethuysen et al. (2017)9, and are fully detailed here to ensure transparency and reproducibility of our radiomics analyses.

**References**

1. AJR AJOR. Liver reporting & data system (li-rads). www.acr.org/Clinical-Resources/Reporting-and-Data-Systems/LI-RADS. Accessed April 29, 2022.

2. Choi JY, Lee JM, Sirlin CB. Ct and mr imaging diagnosis and staging of hepatocellular carcinoma: part ii. Extracellular agents, hepatobiliary agents, and ancillary imaging features. Radiology 2014;273:30-50.

3. Hong SB, Choi SH, Kim SY, et al. Mri features for predicting microvascular invasion of hepatocellular carcinoma: a systematic review and meta-analysis. Liver Cancer 2021;10:94-106.

4. Choi YS, Rhee H, Choi JY, et al. Histological characteristics of small hepatocellular carcinomas showing atypical enhancement patterns on gadoxetic acid-enhanced mr imaging. J Magn Reson Imaging 2013;37:1384-1391.

5. H. Wang et al., “Chest computed tomography radiomics for determining macrolide resistance-associated gene mutation status in children with mycoplasma pneumoniae pneumonia: A two-center study,” Acad. Radiol., vol. 31, no. 9, pp. 3774–3782, Sept. 2024, doi: 10.1016/j.acra.2024.05.008.

6. C. Hou et al., “CT-based liver peritumoural radiomics features predict hepatic metastases sources as gastrointestinal or non-gastrointestinal,” Br. J. Radiol., vol. 98, no. 1167, pp. 458–468, Mar. 2025, doi: 10.1093/bjr/tqae248.

7. Q. Zou et al., “Multimodal prediction of major adverse cardiovascular events in hypertensive patients with coronary artery disease: Integrating pericoronary fat radiomics, CT-FFR, and clinicoradiological features,” Radiol. Med. (Torino), vol. 130, no. 6, pp. 767–781, Mar. 2025, doi: 10.1007/s11547-025-01991-3.

8. X. Huang et al., “Value of a combined magnetic resonance-enhanced and diffusion-weighted imaging dual-sequence radiomics model in predicting the efficacy of high-intensity focused ultrasound ablation for uterine fibroids,” BMC Med. Imaging, vol. 25, no. 1, p. 53, Feb. 2025, doi: 10.1186/s12880-025-01593-5.

9. J. J. M. Van Griethuysen *et al.*, “Computational radiomics system to decode the radiographic phenotype,” *Cancer Res.*, vol. 77, no. 21, pp. e104–e107, Nov. 2017, doi: 10.1158/0008-5472.CAN-17-0339.
